# Supplementary material for: Efficacy of elotuzumab for multiple myeloma in reference to lymphocyte counts and kappa/lambda ratio or B2 microglobulin
Source: Springer Nature journal article supplement (doi:10.1038/s41598-023-32426-6), 2023-03-29

## **Supplemental Materials**

### **Efficacy of elotuzumab for multiple myeloma in reference to lymphocyte counts and kappa/lambda ratio or B2 microglobulin**

Yutaka Shimazu<sup>1</sup>, Junya Kanda<sup>1\*</sup>, Satoru Kosugi<sup>2</sup>, Tomoki Ito<sup>3</sup>, Hitomi Kaneko<sup>4</sup>, Kazunori Imada<sup>4</sup>, Yuji Shimura<sup>5</sup>, Shin-ichi Fuchida<sup>6</sup>, Kentaro Fukushima<sup>7</sup>, Hirokazu Tanaka<sup>8</sup>, Satoshi Yoshihara<sup>9</sup>, Kensuke Ohta<sup>10</sup>, Nobuhiko Uoshima<sup>11</sup>, Hideo Yagi<sup>12</sup>, Hirohiko Shibayama<sup>13</sup>, Ryosuke Yamamura<sup>14</sup>, Yasuhiro Tanaka<sup>15</sup>, Hitoji Uchiyama<sup>16</sup>, Yoshiyuki Onda<sup>17</sup>, Yoko Adachi<sup>18</sup>, Hitoshi Hanamoto<sup>19</sup>, Ryoichi Takahashi<sup>20</sup>, Mitsuhiro Matsuda<sup>21</sup>, Takashi Miyoshi<sup>22</sup>, Teruhito Takakuwa<sup>23</sup>, Masayuki Hino<sup>23</sup>, Naoki Hosen<sup>7</sup>, Shosaku Nomura<sup>3</sup>, Chihiro Shimazaki<sup>6</sup>, Itaru Matsumura<sup>8</sup>, Akifumi Takaori-Kondo<sup>1</sup> and Junya Kuroda<sup>5</sup>, Kansai Myeloma Forum<sup>24</sup>

### **Inventory of Supplemental Information**

#### **Supplemental Figure Legends**

##### **Supplemental Figures**

**Figure S1.**

**Figure S2.**

**Figure S3.**

**Figure S4.**

**Figure S5.**

**Figure S6.**

**Figure S7.**

**Figure S8.**

**Figure S9.**

**Figure S10.**

## Supplemental Figure Legends

**Figure S1. (A-F)** The histogram of white blood cell counts (A), neutrophil counts (B), monocyte counts (C), lymphocyte counts (D),  $\beta_2$  microglobulin (B2MG) (E) and  $\kappa/\lambda$  ratio (F). The horizontal axis was plot in log scale. The median, 25<sup>th</sup> percentile and 75<sup>th</sup> percentile values are described in the left upper panel of each figure.

**Figure S2. (A)** The time to next treatment (TTNT) of the multiple myeloma (MM) patients according to the  $\beta_2$  microglobulin (B2MG) level: B2MG less than 3.5 mg/L (*black*), 3.5 mg/L or more to less than 5.5 mg/L (*red*) and 5.5 mg/L or more (*red*). The median TTNT (months) and 95% CI are shown. The hazard ratio (HR) of B2MG <3.5mg/L as a reference and 95% CI are also described. **(B)** TTNT of the MM patients according to the white blood cell (WBC) counts: less than 2500/ $\mu$ L (*black*), 2500/ $\mu$ L or more to less than 3500/ $\mu$ L (*red*), 3500/ $\mu$ L or more to less than 4500/ $\mu$ L (*blue*) and 4500/ $\mu$ L or more (*green*). The median TTNT (months) and 95% CI are shown. The HR of WBC counts <2500/ $\mu$ L and 95% CI are also described as a reference. **(C)** TTNT of the MM patients according to the lymphocyte counts: less than 700/ $\mu$ L (*black*), 700/ $\mu$ L or more to less than 1000/ $\mu$ L (*red*), 1000/ $\mu$ L or more to less than 1400/ $\mu$ L (*blue*) and 1400/ $\mu$ L or more (*green*). The median TTNT (months) and 95% CI are shown. The HR of lymphocyte counts <700/ $\mu$ L and 95% CI are also described as a reference. **(D)** TTNT of the MM patients according to the neutrophile counts: less than 1000/ $\mu$ L (*black*), 1000/ $\mu$ L or more to less than 2000/ $\mu$ L (*red*), 2000/ $\mu$ L or more to less than 3000/ $\mu$ L (*blue*) and 3000/ $\mu$ L or more (*green*). The median TTNT (months) and 95% CI are shown. The HR of neutrophile counts <1000/ $\mu$ L and 95% CI are also described as a reference. **(E)** TTNT of the MM patients according to the monocyte counts: less than 200/ $\mu$ L (*black*), 200/ $\mu$ L or

more to less than 300/ $\mu$ L (*red*), 300/ $\mu$ L or more to less than 400/ $\mu$ L (*blue*) and 400/ $\mu$ L or more (*green*). The median TTNT (months) and 95% CI are shown. The HR of monocyte counts <200/ $\mu$ L and 95% CI are also described as a reference. The number of patients at risk in each group is shown in the lower panel of each figure.

Abbreviations: CI. CI: confidence interval.

**Figure S3.** The proportion of the best treatment response against elotuzumab treatment.

The overall response rate includes CR, VGPR and PR.

Abbreviations: CR, VGPR, PR, SD and PD. CR: complete remission; VGPR: very good partial response; PR: partial response; SD: stable disease; PD: progressive disease.

**Figure S4. (A)** The time to next treatment (TTNT) of the multiple myeloma (MM) patients according to the treatment regimen: elotuzumab, lenalidomide and dexamethasone (ERd, *black*) and elotuzumab, pomalidomide and dexamethasone (EPd, *red*). The median TTNT (months) and 95% CI are shown. **(B)** The TTNT of the MM patients according to the number of elotuzumab treatments: first time (*black*) and second time (*red*). The median TTNT (months) and 95% CI are shown. The number of patients at risk in each group is shown in the lower panel of each figure.

Abbreviations: CI. CI: confidence interval.

**Figure S5. (A)** The TTNT of the MM patients treated with elotuzumab according to the neutrophil counts: less than 3000/ $\mu$ L (*black*) and 3000/ $\mu$ L or more (*red*). **(B)** The TTNT of the MM patients treated with elotuzumab according to the monocyte counts: less than 300/ $\mu$ L (*black*) and 300/ $\mu$ L or more (*red*). The number of patients at risk in each group is

shown in the lower panel of each figure.

Abbreviations: CI. CI: confidence interval.

**Figure S6. (A)** The TTNT of the MM patients treated with elotuzumab according to the prior regimen number: fewer than 4 prior regimens (*black*) and 4 or more prior regimens (*red*). The median TTNT (months) and 95% CI are shown. NA indicates not applicable. **(B)** The TTNT of the MM patients treated with elotuzumab according to prior daratumumab use: nonuse of daratumumab (*black*) and prior use of daratumumab (*red*). The median TTNT (months) and 95% CI are shown. **(C)** The TTNT of the MM patients treated with elotuzumab according to the period from prior daratumumab use: less than 6 months (*black*) and 6 months or more (*red*). The median TTNT (months) and 95% CI are shown. The number of patients at risk in each group is shown in the lower panel of each figure.

Abbreviations: CI. CI: confidence interval.

**Figure S7.** Comparing the lymphocyte counts between prior use of daratumumab (not used or previously used). Average lymphocyte counts with standard deviation (SD) of each group were shown in the figure.

**Figure S8. (A)** The TTNT of the MM patients treated with elotuzumab, lenalidomide and dexamethasone (ERd) regimen according to the scoring system used in model 1: 0 points (*black*), 1 point (*red*) and 2 points (*blue*). Total scores were calculated according to the lymphocyte counts (0 points when  $\geq 1400/\mu\text{L}$  and 1 point when  $< 1400/\mu\text{L}$ ) and  $\kappa/\lambda$  ratio (0 points when 0.1-10 and 1 point when  $< 0.1$  or  $\geq 10$ ) before elotuzumab treatment

(model 1). The median TTNT (months) and 95% CI values are shown in the figure. The hazard ratio (HR) of total score 0 as a reference with 95% CI is also described. The TTNT values were corrected by the following factors: prior treatment regimen and the use of daratumumab before. **(B)** The TTNT of the MM patients treated with a regimen of elotuzumab, pomalidomide and dexamethasone (EPd) according to the scoring system used in model 1 and described above in panel **(A)**. The median TTNT (months) and 95% CI are shown in the figure. The hazard ratio (HR) of total score 0 as a reference with 95% CI is also described. The TTNT values were corrected by the following factors: prior treatment regimen and prior use of daratumumab. The number of patients at risk in each group is shown in the lower panel of each figure.

Abbreviations: CI and NA. CI: confidence interval; NA: not applicable.

**Figure S9. (A)** The TTNT of the MM patients treated with a regimen of elotuzumab, pomalidomide and dexamethasone (EPd) according to the scoring system used in model 1: 0 points (*black*), 1 point (*red*) and 2 points (*blue*). Total scores were calculated according to the lymphocyte counts (0 points when  $\geq 1400/\mu\text{L}$  and 1 point when  $< 1400/\mu\text{L}$ ) and B2MG (0 points when less than 5.5mg/L and 1 point when 5.5mg/L or more) before elotuzumab treatment (model 2). The median TTNT (months) and 95% CI are shown in the figure. The hazard ratio (HR) of the total score 0 and 95% CI are also described as a reference. The TTNT values were corrected by the prior use of daratumumab. **(B)** The TTNT of the MM patients treated with a regimen of elotuzumab, pomalidomide and dexamethasone (EPd) according to the scoring system (model 1) as in panel **(A)**. The median TTNT (months) and 95% CI are shown in the figure. The hazard ratio (HR) of the total score 0 and 95% CI are also described as a reference. The TTNT

were corrected by the prior use of daratumumab. The number of patients at risk in each group is shown in the lower panel of each figure.

Abbreviations: CI and NA. CI: confidence interval; NA: not applicable.

**Figure S10.** The treatment algorithm according to the scoring system.

**Figure S1**

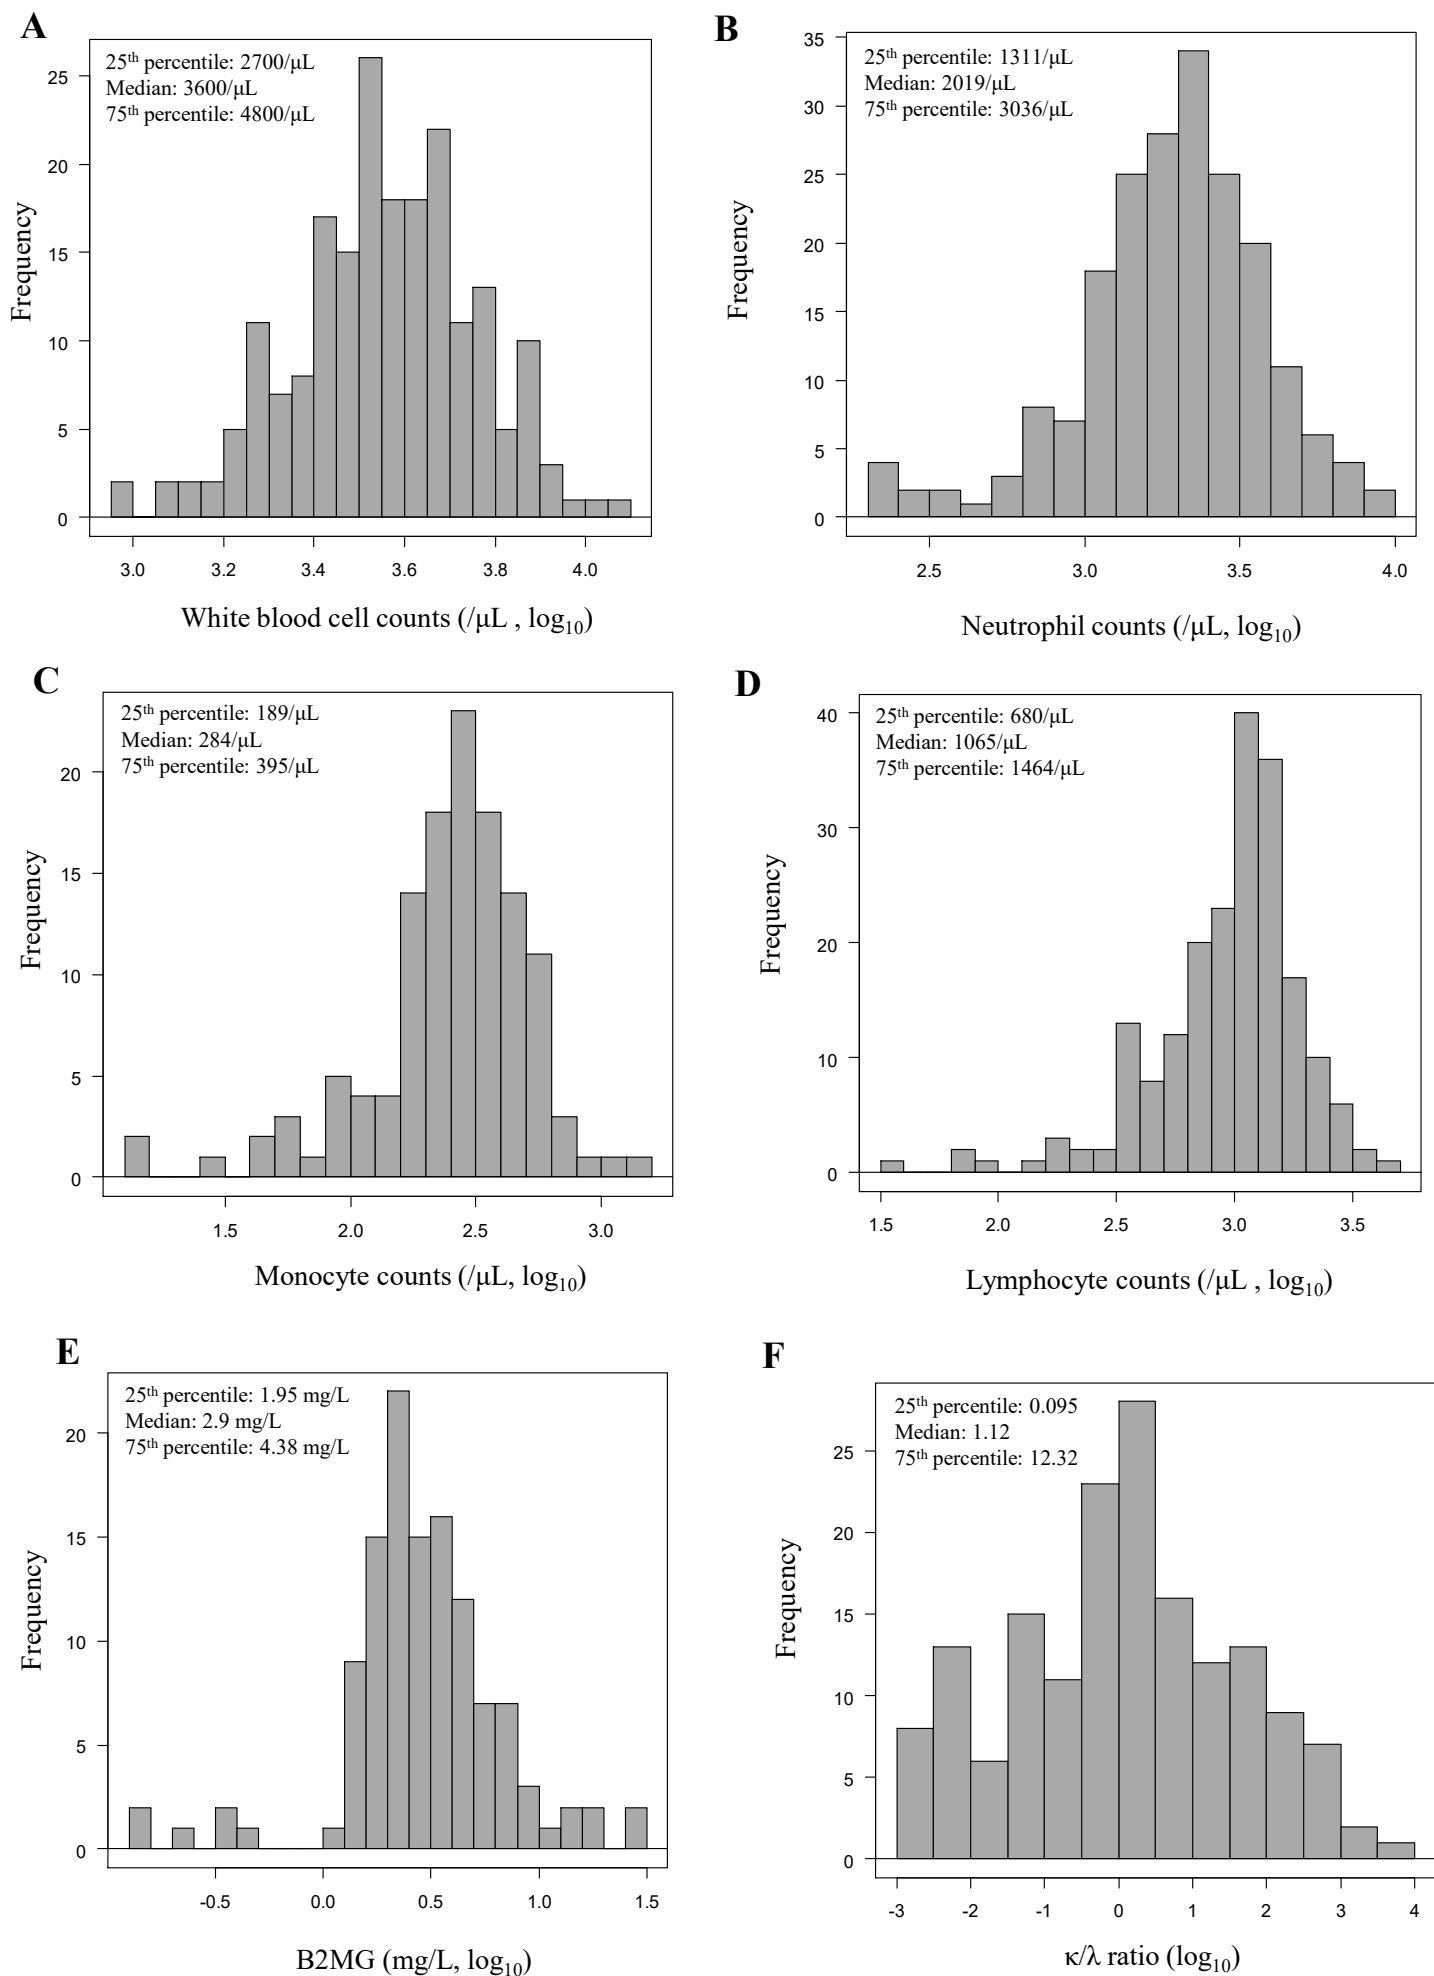



**Figure S2**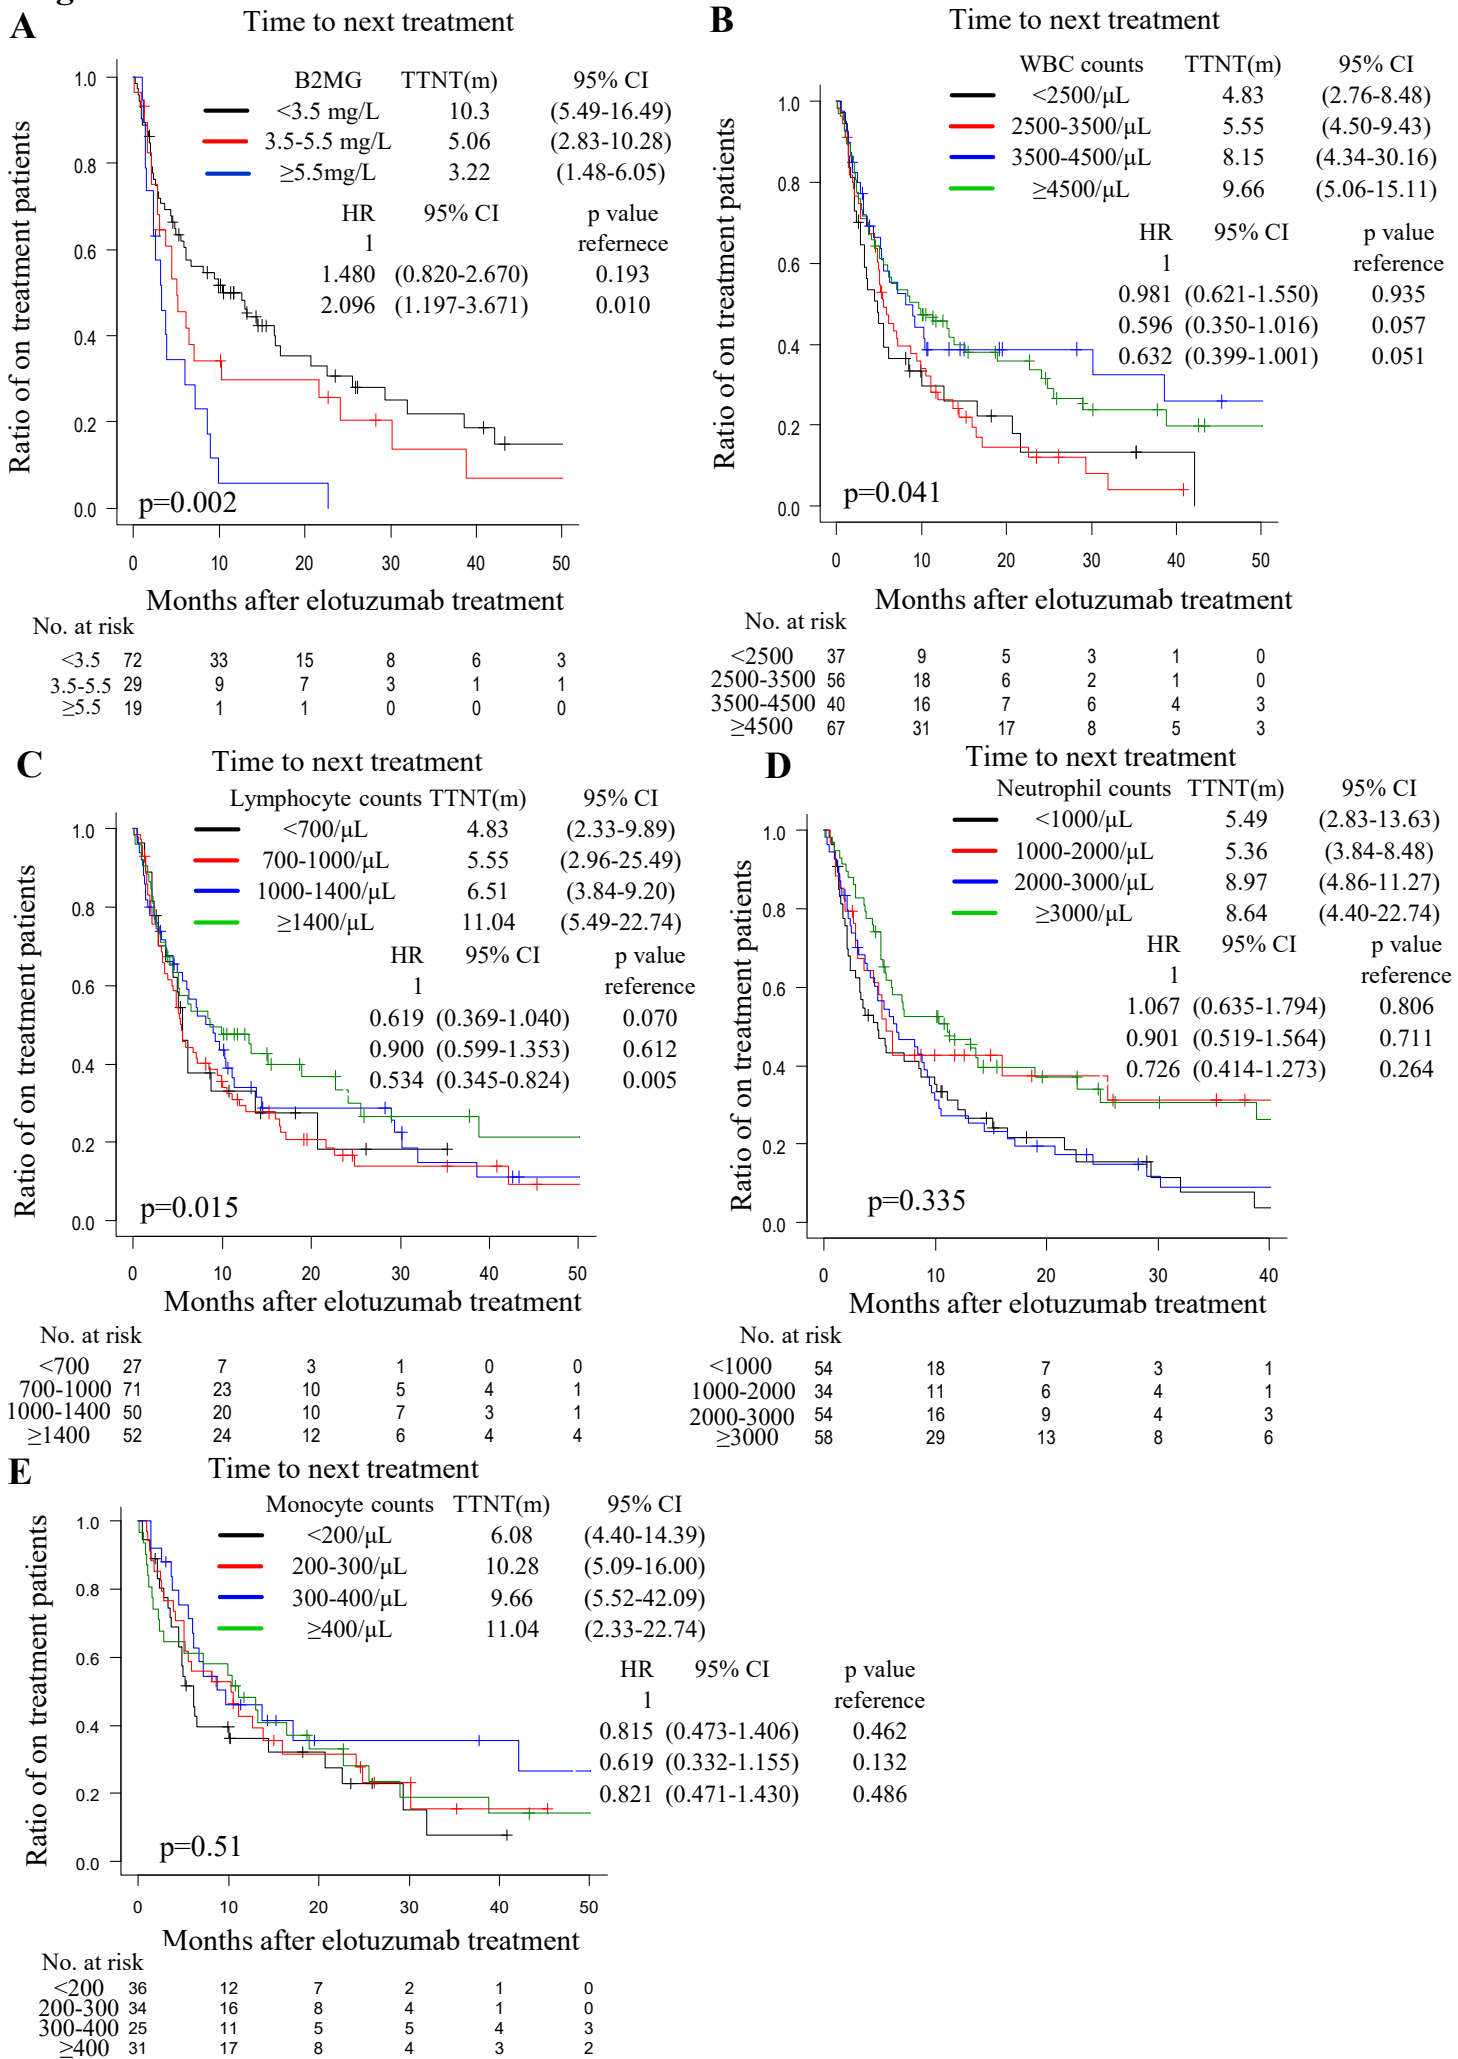

**Figure S3**

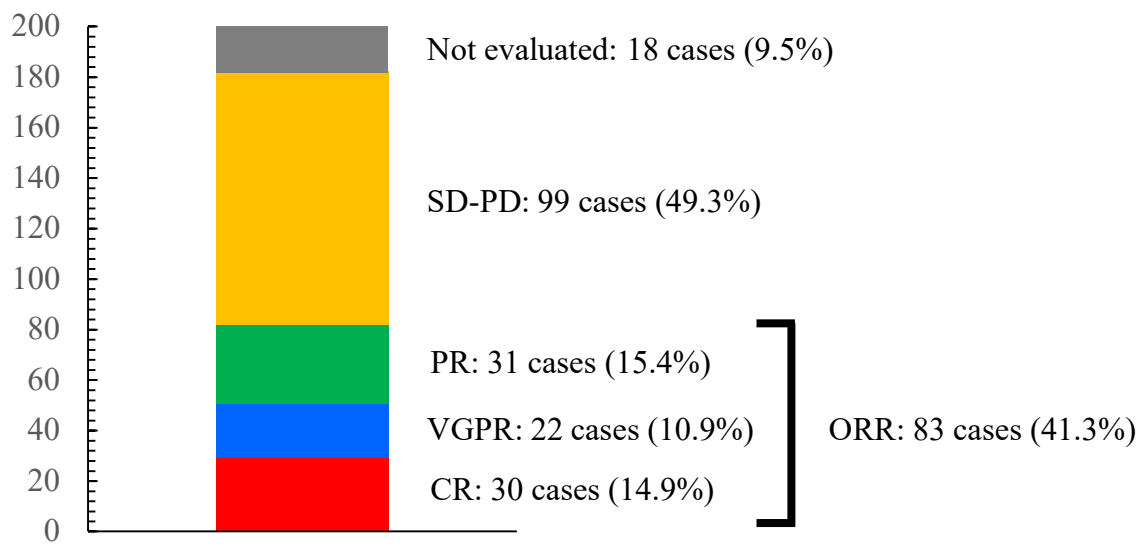

**Figure S4**

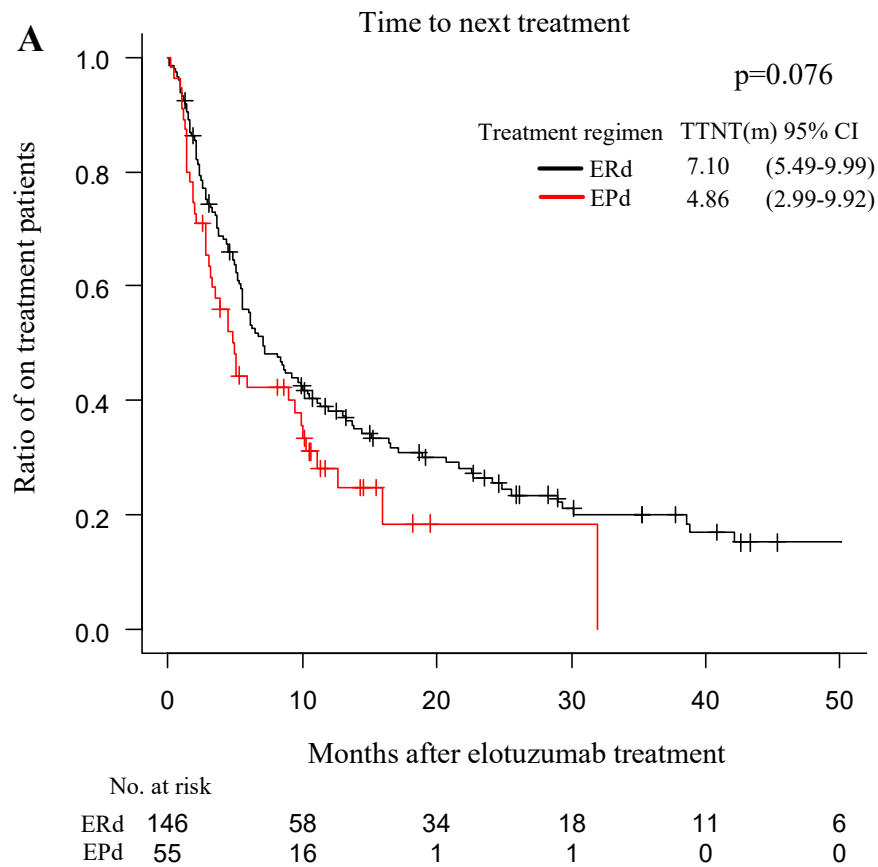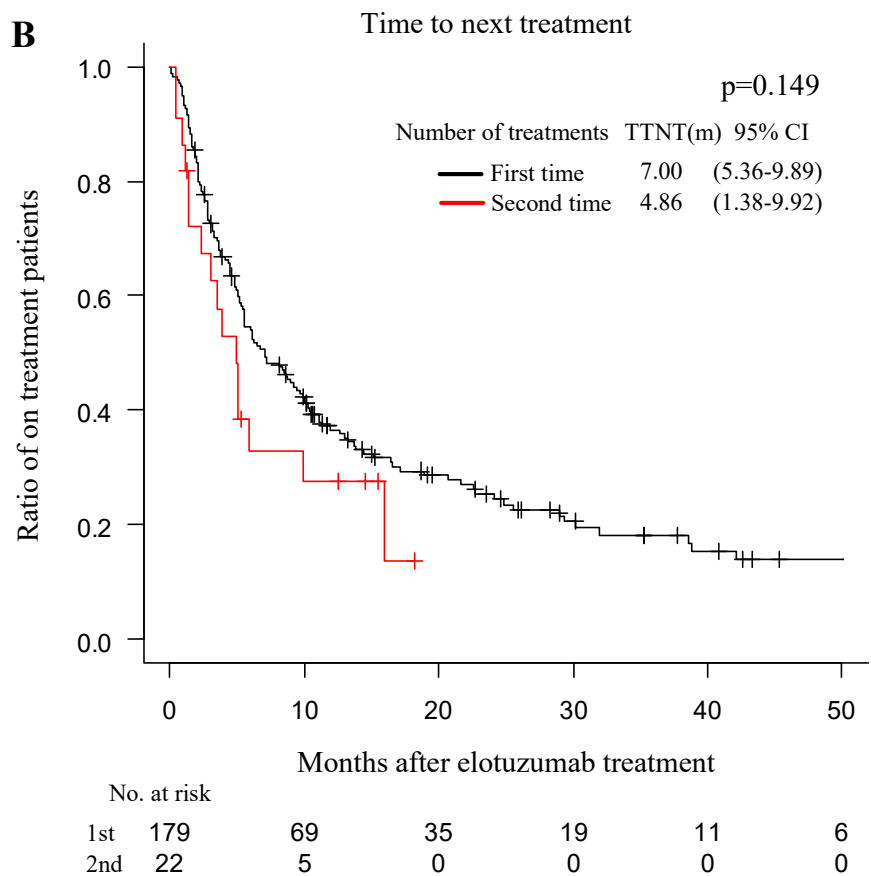

**Figure S5**

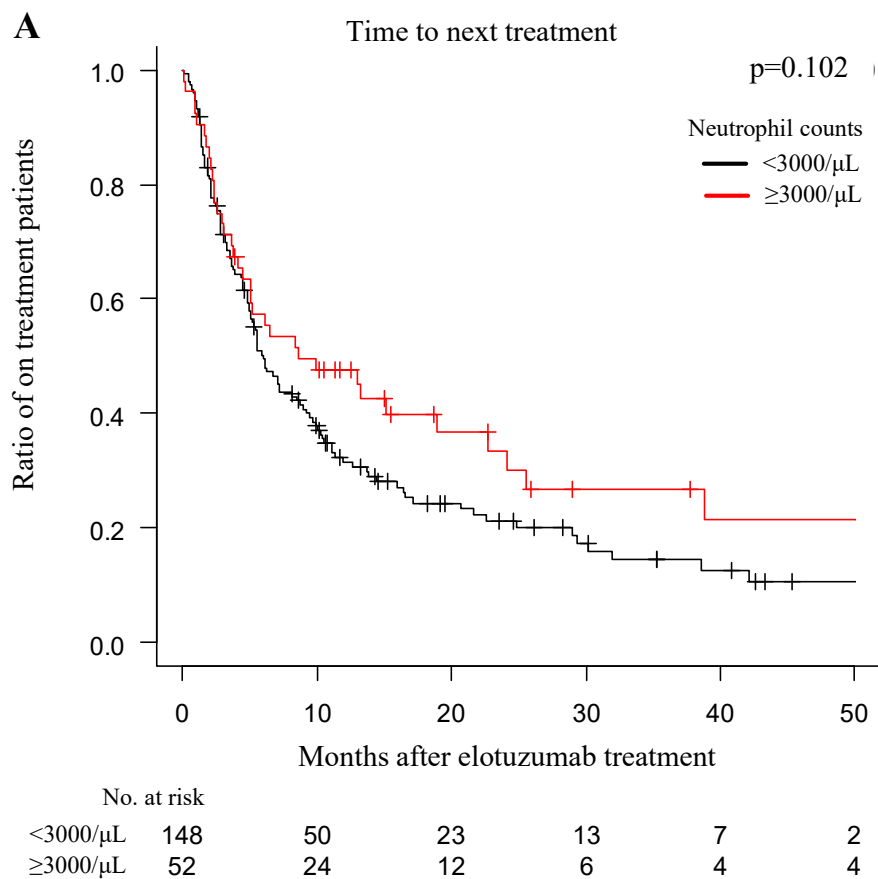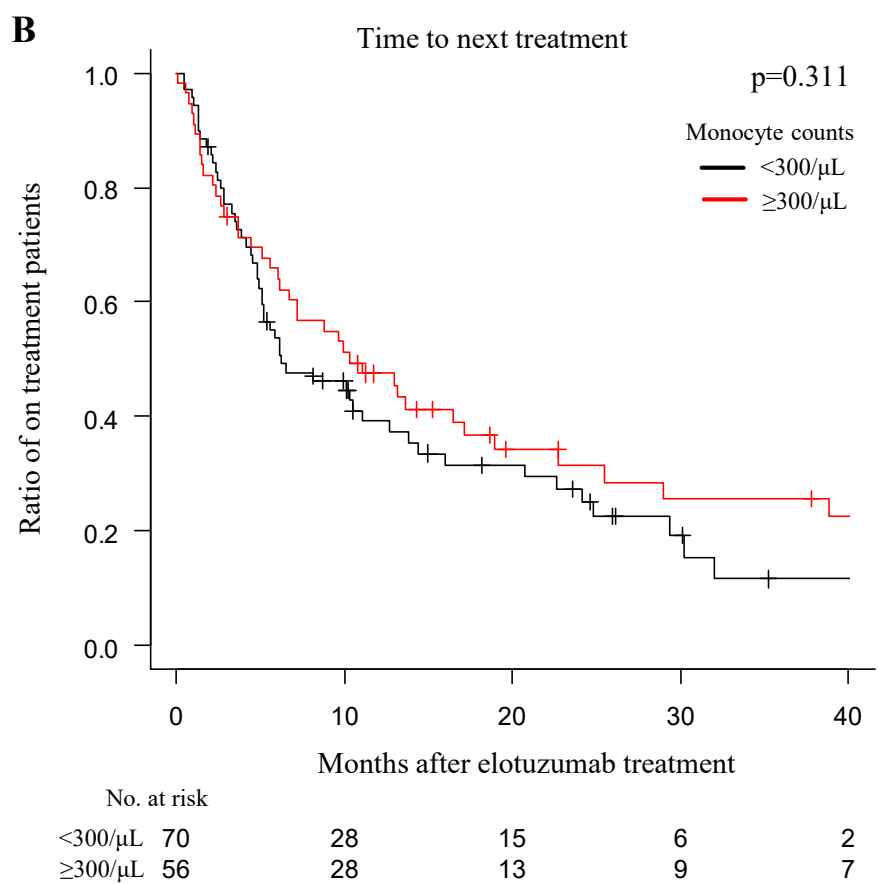

**Figure S6**

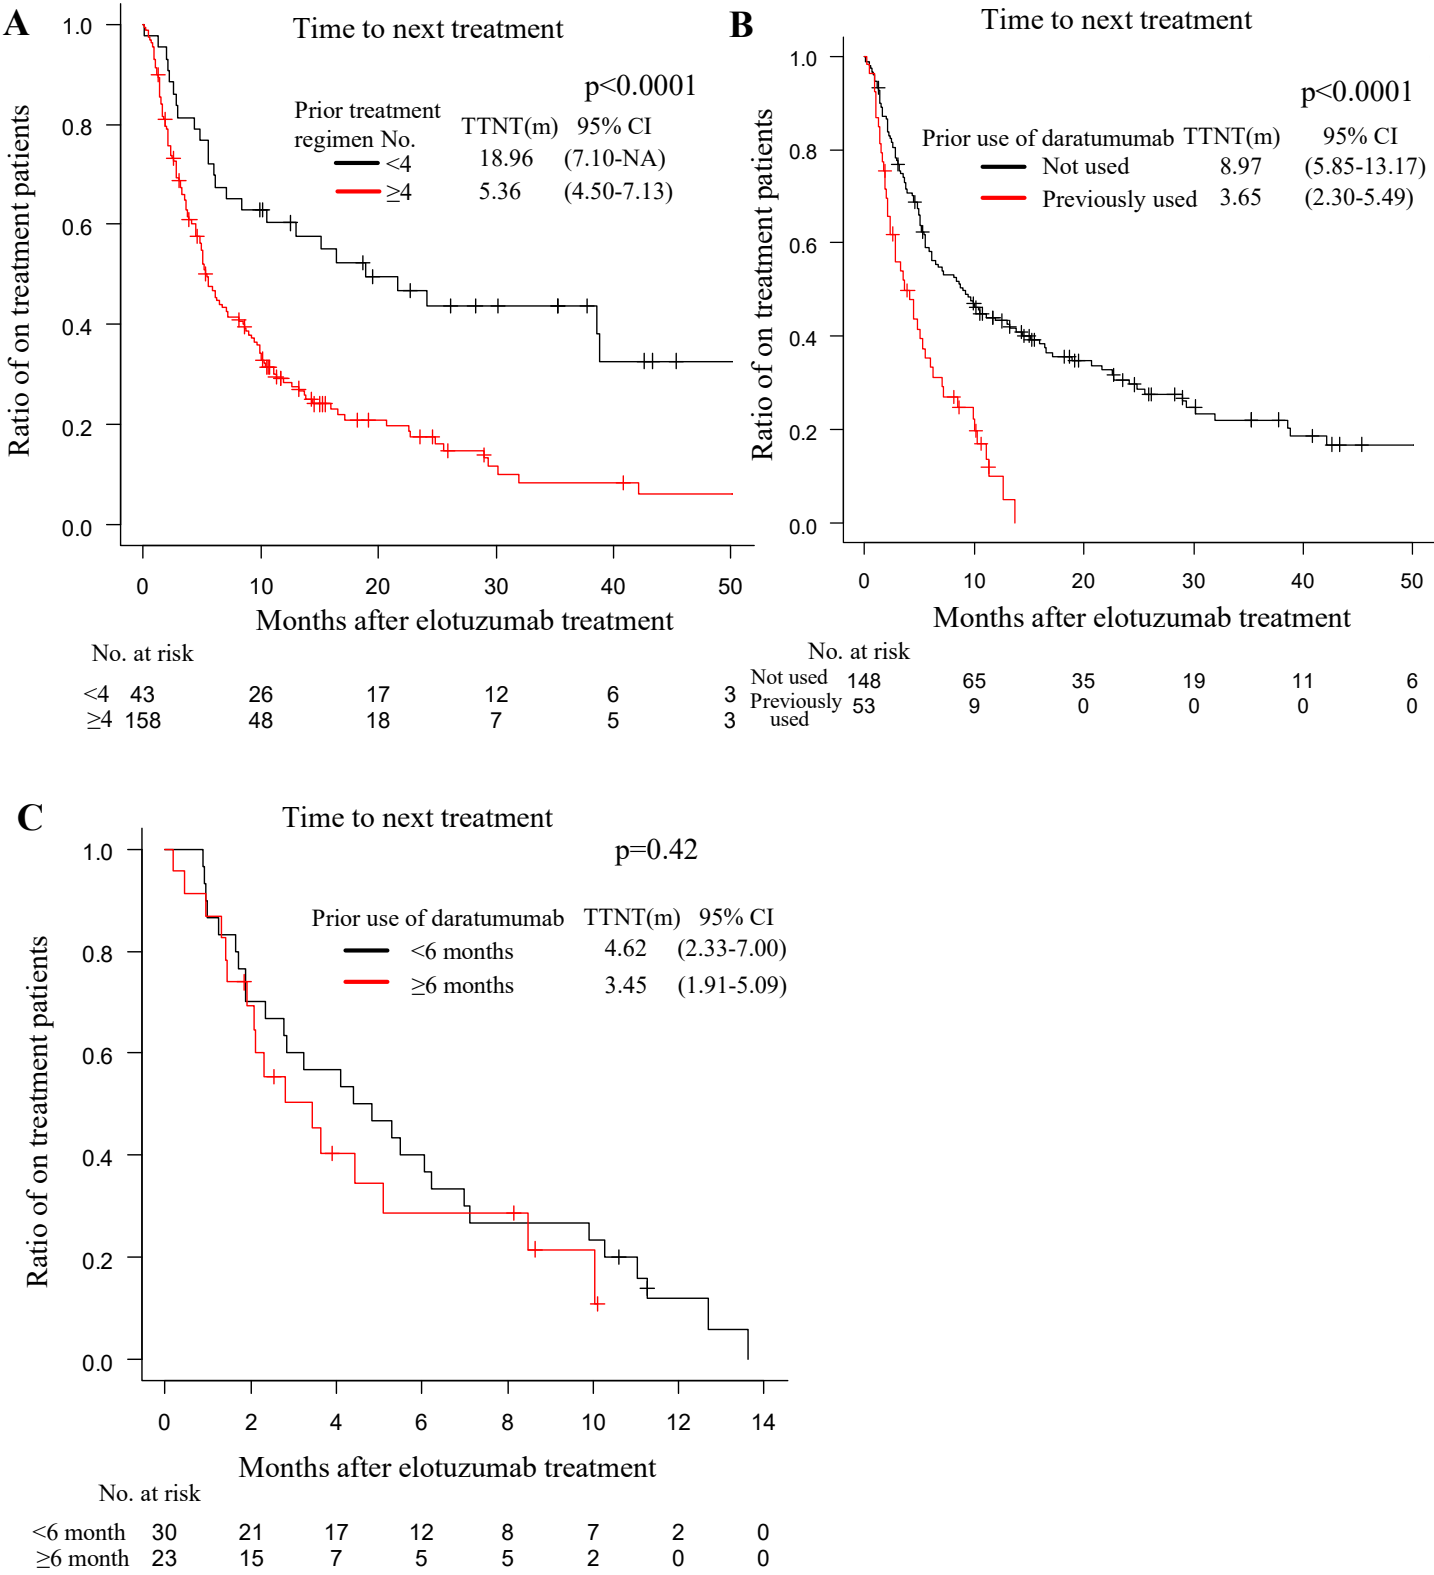

**Figure S7**

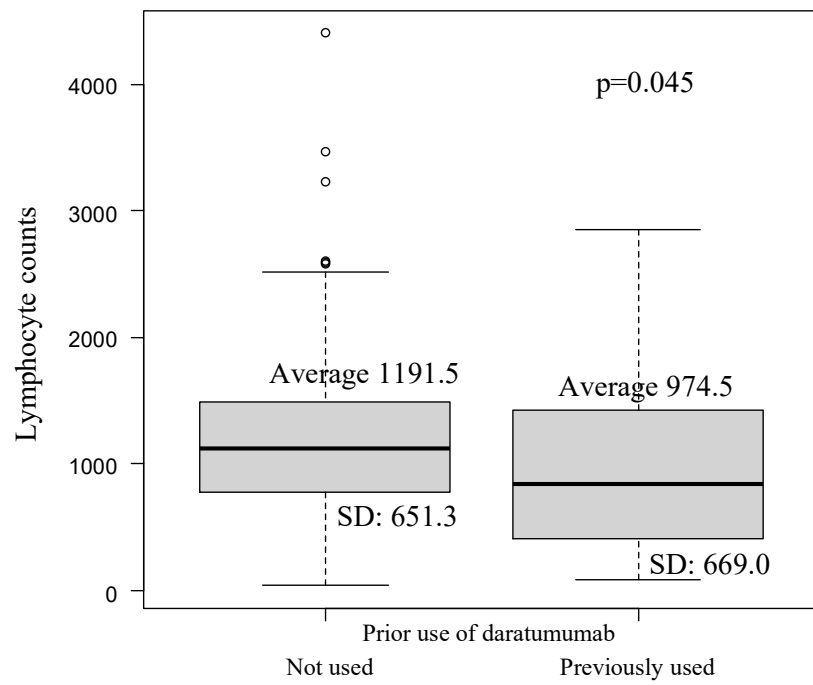

Figure S8

A

Time to next treatment

ERd regimen

p<0.001

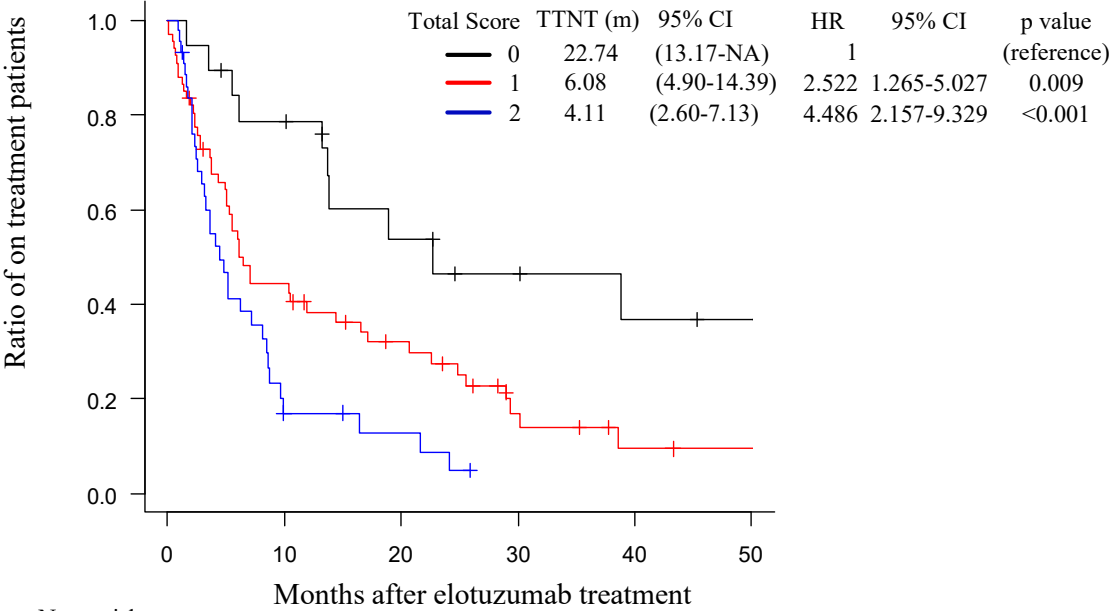

No. at risk

|   |    |    |    |   |   |   |
|---|----|----|----|---|---|---|
| 0 | 20 | 15 | 9  | 6 | 4 | 3 |
| 1 | 62 | 26 | 16 | 6 | 2 | 1 |
| 2 | 38 | 5  | 3  | 0 | 0 | 0 |

| Score | Lymphocyte counts | $\kappa/\lambda$ ratio |
|-------|-------------------|------------------------|
| 0     | $\geq 1400$       | 0.1-10                 |
| 1     | $<1400$           | $<0.1, \geq 10$        |

B

Time to next treatment

EPd regimen

p=0.028

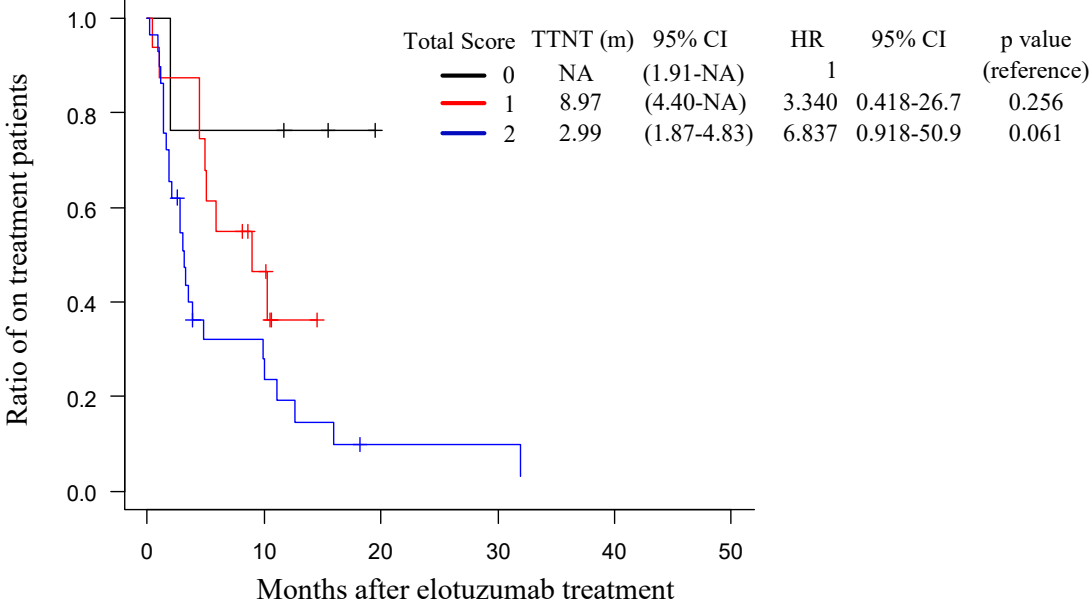

No. at risk

|   |    |   |   |   |   |   |
|---|----|---|---|---|---|---|
| 0 | 4  | 3 | 0 | 0 | 0 | 0 |
| 1 | 15 | 5 | 0 | 0 | 0 | 0 |
| 2 | 28 | 6 | 1 | 1 | 0 | 0 |

| Score | Lymphocyte counts | $\kappa/\lambda$ ratio |
|-------|-------------------|------------------------|
| 0     | $\geq 1400$       | 0.1-10                 |
| 1     | $<1400$           | $<0.1, \geq 10$        |

**Figure S9**

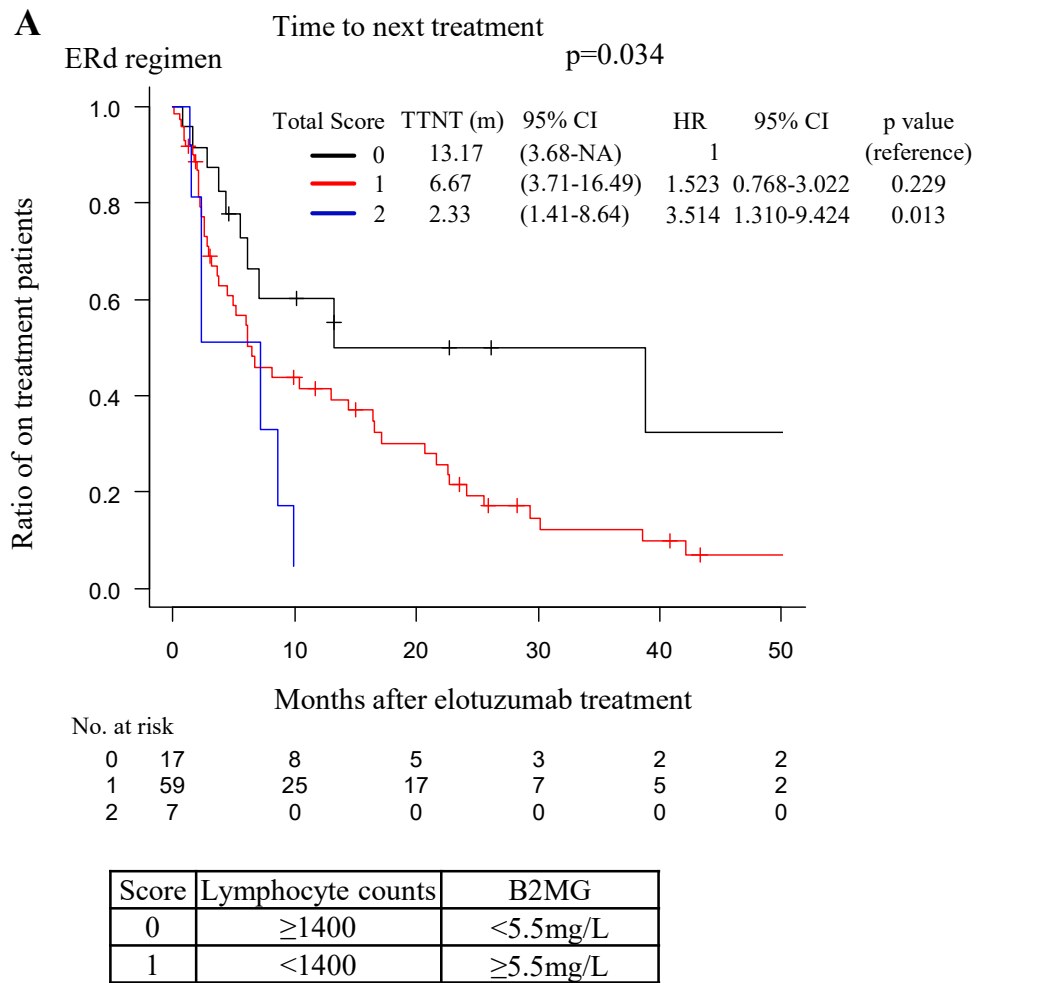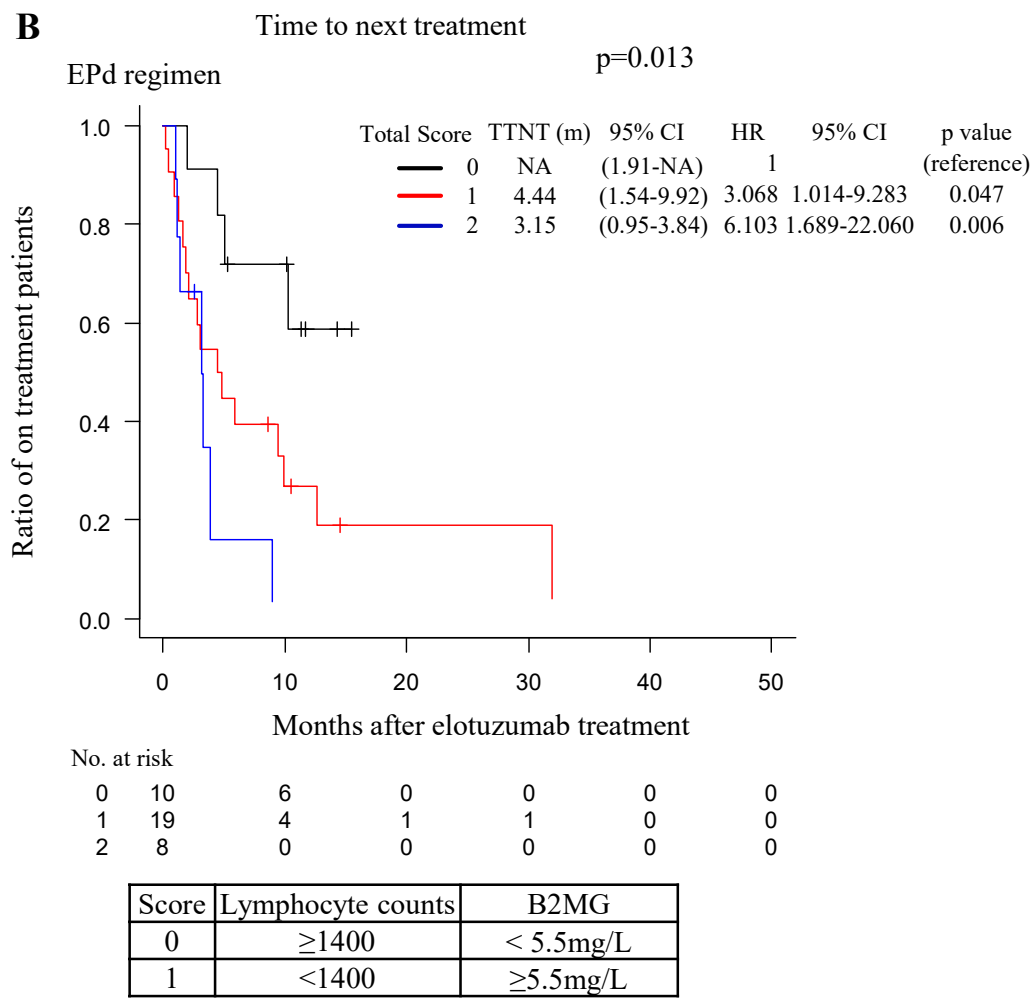



**Figure S10**

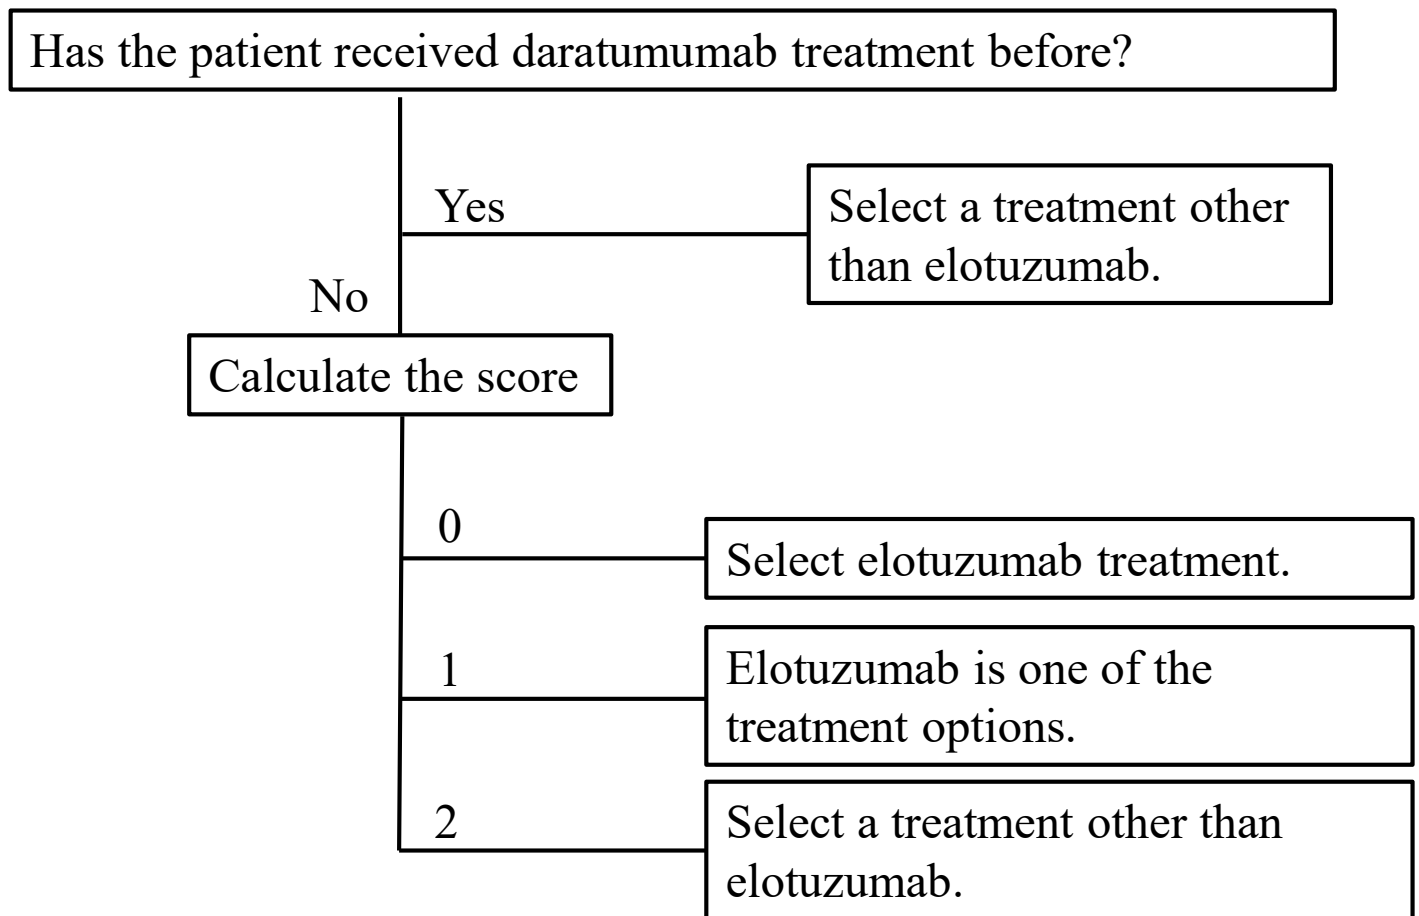

Supplement: MOESM1 [file 41598_2023_32426_MOESM1_ESM.pdf]
